# Supplementary material
Source: publisher figshare collection journal article supplement (https://karger.figshare.com/ndownloader/files/8707888)
Supplement: Supplementary file 1 [file 8707888]

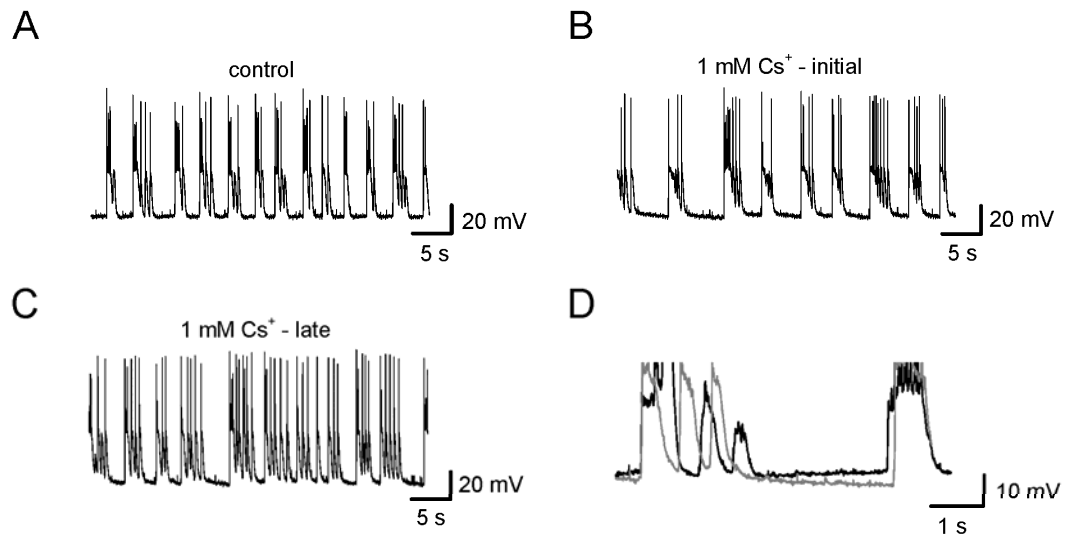

Fig. S1.  $\text{Cs}^+$  action on burst frequency and pacemaker potentials in mouse cortical cultures. (A--D) SBA activity recorded from a PN under current clamp conditions in a 18 DIV mouse cortical culture. Voltage traces from a continuous recording prior to (A), shortly after addition of 1 mM  $\text{Cs}^+$  to the saline (B), and after prolonged exposure to  $\text{Cs}^+$  (C). (D) Parts of the traces shown in A and B at an expanded time scale (black: control, gray: 1 mM  $\text{Cs}^+$ ). Note the blocking action of  $\text{Cs}^+$  on the slow interburst pacemaker depolarisation.
